# Supplementary material for: Exploring potential inhibitors from Eriobotrya japonica targeting AChE and BChE in Alzheimer's Disease through docking, ADMET profiling, and DFT analysis
Source: Research Square preprint supplement (doi:10.21203/rs.3.rs-7521725/v1), 2025-09-25
Supplement: Supplementary file 1 [file eb5f89c627c0c4d899c855d1.docx]

**Table S2**.Stop Tox toxicity parameters of the selected compound

| **Compound** | **Acute Inhalation Toxicity (Conf)** | **Acute Oral Toxicity (Conf)** | **Acute Dermal Toxicity (Conf)** | **Eye Irritation &**  **Corrosion (Conf)** | **Skin Sensitization**  **(Conf)** | **Skin Irritation & Corrosion (Conf)** |
| --- | --- | --- | --- | --- | --- | --- |
| chrysin | Non-Toxic (-) (65.0%) | Non-Toxic (-) (73.0%) | **Toxic (+) (63.0%)** | **Toxic (+) (54.0%)** | **Sensitizer (+) (70%)** | **Negative (-) (80%)** |
