# Supplementary material for: Exploring potential inhibitors from Eriobotrya japonica targeting AChE and BChE in Alzheimer's Disease through docking, ADMET profiling, and DFT analysis
Source: Research Square preprint supplement (doi:10.21203/rs.3.rs-7521725/v1), 2025-09-25
Supplement: Supplementary file 2 [file f6081c25a58924649b63ab57.docx]

**Table S1**. Docking and Swiss ADMET results of selected compounds of E. japonica

| **Code** | **Docking score** | | **BBB** | **Bioavailability** | **LRF** |
| --- | --- | --- | --- | --- | --- |
| **4EY7** | **5DYW** |
| **PH-1** | -0.177 | -4.248 | No | 0.17 | No |
| **PH-2** | -12.734 | -13.033 | No | 0.17 | No |
| **PH-3** | -13.337 | -15.853 | No | 0.17 | No |
| **PH-4** | -13.422 | -10.583 | No | 0.17 | No |
| **PH-5** | -13.337 | -10.583 | No | 0.17 | No |
| **PH-6** | -10.258 | -12.946 | No | 0.17 | No |
| **PH-7** | -8.617 | -14.916 | No | 0.17 | No |
| **PH-8** | -11.976 | -11.815 | No | 0.17 | No |
| **PH-9** | -14.04 | -10.323 | No | 0.17 | No |
| **PH-10** | -7.64 | -5.995 | YES | 0.55 | Yes |
| **PH-11** | -8.489 | -6.335 | yes | 0.55 | Yes |
| **PH-12** | -14.333 | -12.51 | NO | 0.17 | No |
| **PH-13** | -15.02 | -10.643 | No | 0.17 | No |
| **PH-14** | -5.457 | -4.221 | Yes | 0.85 | Yes |
| **PH-15** | -8.956 | -6.544 | No | 0.56 | Yes |
| **PH-16** | -4.478 | -5.135 | No | 0.56 | Yes |
| **PH-17** | -5.777 | -4.984 | No | 0.56 | Yes |
| **PH-18** | -12.217 | -9.447 | No | 0.55 | Yes |
| **PH-19** | -11.914 | -7.443 | No | 0.55 | Yes |
| **PH-20** | -11.143 | -10.541 | No | 0.55 | Yes |
| **PH-21** | -11.771 | -11.579 | No | 0.17 | no |
| **PH-22** | -13.072 | -11.682 | No | 0.17 | no |
| **PH-23** | -13.922 | -13.006 | No | 0.17 | no |
| **PH-24** | -7.202 | -10.301 | No | 0.11 | No |
| **PH-25** | -7.274 | -7.625 | No | 0.11 | Yes |
| **PH-26** | -5.877 | -4.365 | YES | 0.85 | Yes |
| **PH-27** | -7.709 | -5.175 | yES | 0.85 | Yes |
| **PH-28** | -13.293 | -11.981 | No | 0.17 | No |
| **PH-29** | -10.386 | -9.131 | No | 0.11 | Yes |
| **PH-30** | -8.513 | -3.331 | No | 0.17 | No |
| **PH-31** | 0.337 | -1.544 | No | 0.17 | No |
| **PH-32** | -11.924 | -7.167 | No | 0.17 | No |
| **PH-33** | -12.852 | -11.308 | No | 0.17 | No |
| **PH-34** | -11.692 | -7.727 | No | 0.55 | Yes |
| **PH-35** | -12.667 | -8.756 | No | 0.11 | No |
| **PH-36** | -11.807 | -6.732 | No | 0.11 | No |
| **PH-37** | -9.331 | -7.715 | YES | 0.55 | Yes |
| **PH-38** | -14.412 | -12.189 | No | 0.11 | No |
| **PH-39** | -10.23 | -7.989 | No | 0.55 | Yes |
| **PH-40** | -11.866 | -7.379 | No | 0.55 | Yes |
| **PH-41** | -9.81 | -12.398 | No | 0.17 | No |
| **PH-42** | -14.206 | -10.885 | No | 0.17 | No |
| **PH-43** | -10.432 | -5.362 | No | 0.17 | No |
| **PH-44** | -14.812 | -11.352 | No | 0.17 | No |
| **PH-45** | -12.012 | -15.161 | No | 0.17 | No |
| **PH-46** | -11.357 | -11.336 | No | 0.11 | No |
| **PH-47** | -10.306 | -7.624 | No | 0.17 | No |
| **PH-48** | -15.892 | -10.738 | No | 0.17 | No |
| **PH-49** | -15.501 | -6.733 | No | 0.17 | No |
| **PH-50** | -13.677 | -10.455 | No | 0.55 | Yes |
| **PH-51** | -14.709 | -12.366 | No | 0.17 | No |
| **PH-52** | 1.361 | -3.305 | No | 0.11 | No |
| **PH-53** | -9.106 | -7.2 | No | 0.56 | Yes |
| **PH-54** | -8.705 | -6.413 | No | 0.56 | Yes |
| **Control** | 7.1 | 7 | YES | 0.55 | Yes |
